# Supplementary material for: Localization and Quantification of Callose in the Streptophyte Green Algae Zygnema and Klebsormidium: Correlation with Desiccation Tolerance
Source: PubMed Central journal article supplement — Plant Cell Physiol. 2015 Sep 26;56(11):2259–70. doi: 10.1093/pcp/pcv139 (PMC4650865; doi:10.1093/pcp/pcv139), 2015-09-26
Supplement: supp_pcv139_pcp-2015-e-00365-File011.pdf [file supp_pcv139_pcp-2015-e-00365-File011.pdf]

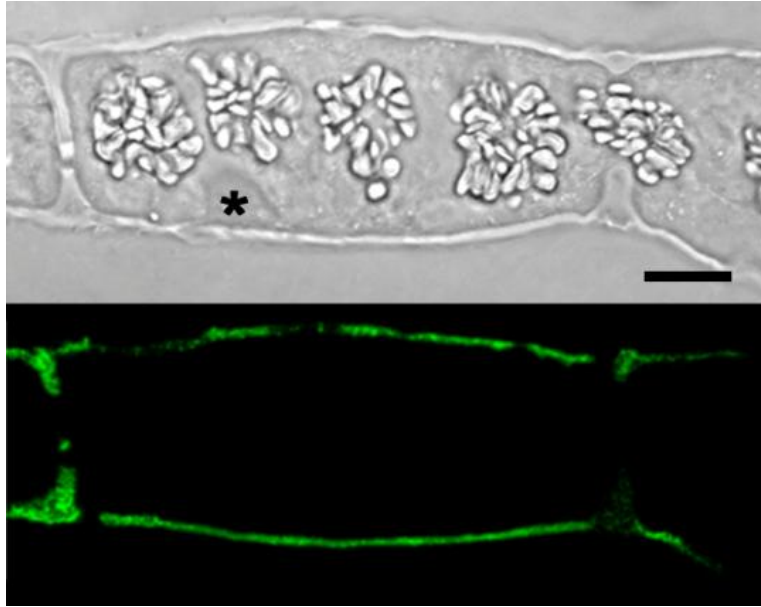

**Supplementary Fig. S2.** Desiccated (210 min) and deformed cell of *Zygema* E-A with a protoplast partially retracted from the cell wall (asterisk). Strong antibody labelling (green) in the convexly expanded longitudinal cell walls. Scale bar = 10  $\mu$ m.
