# Supplementary material for: Localization and Quantification of Callose in the Streptophyte Green Algae Zygnema and Klebsormidium: Correlation with Desiccation Tolerance
Source: PubMed Central journal article supplement — Plant Cell Physiol. 2015 Sep 26;56(11):2259–70. doi: 10.1093/pcp/pcv139 (PMC4650865; doi:10.1093/pcp/pcv139), 2015-09-26
Supplement: supp_pcv139_pcp-2015-e-00365-File012.pdf [file supp_pcv139_pcp-2015-e-00365-File012.pdf]

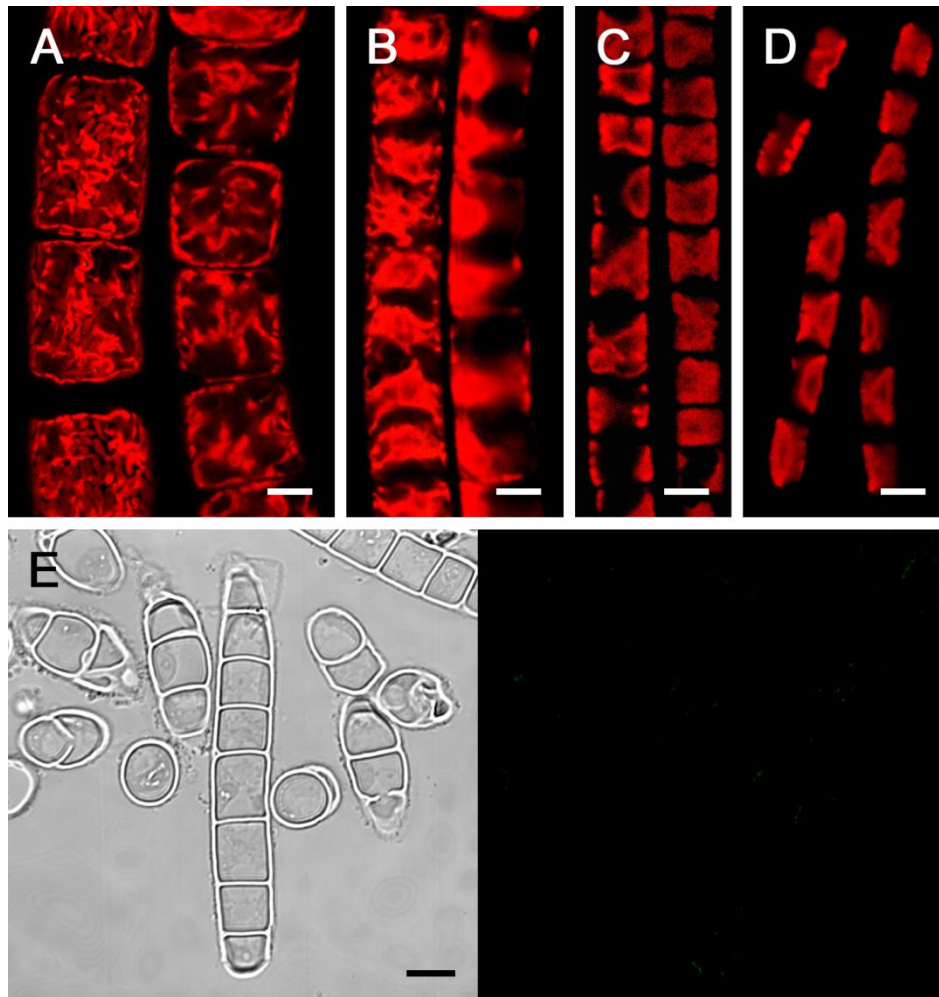

**Supplementary Fig. S3.** Negative-control for immuno-staining by omitting the primary antibody. Live-cell labelling (A-D) and labelling of semithin section (E). (A) *Zygnema* S, (B) *Zygnema* E-A, (C, E) *Klebsormidium crenulatum*, (D) *Klebsormidium nitens*.
