# Supplementary material for: Localization and Quantification of Callose in the Streptophyte Green Algae Zygnema and Klebsormidium: Correlation with Desiccation Tolerance
Source: PubMed Central journal article supplement — Plant Cell Physiol. 2015 Sep 26;56(11):2259–70. doi: 10.1093/pcp/pcv139 (PMC4650865; doi:10.1093/pcp/pcv139), 2015-09-26
Supplement: supp_pcv139_pcp-2015-e-00365-File013.pdf [file supp_pcv139_pcp-2015-e-00365-File013.pdf]

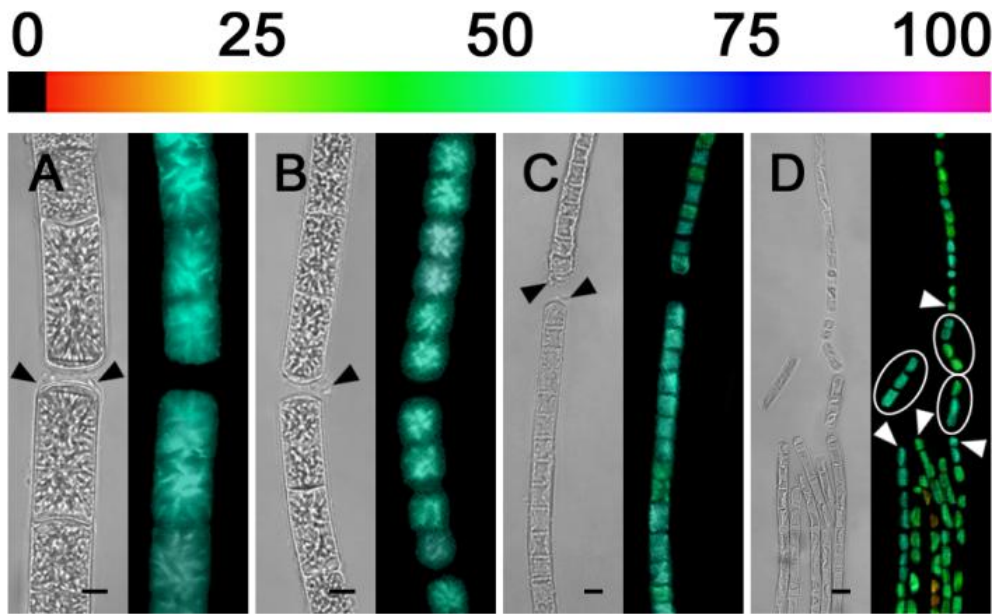

**Supplementary Fig. S4.** Near infrared (NIR) and corresponding Y(II) images (false colored) of fragmented *Zygnema* S (A), *Zygnema* E-A (B), *Klebsormidium cernulatum* (C) and *Klebsormidium nitens* (D) filaments (controls). The colour bar at the top indicates the relative Y(II) as a percentage. (A) detached cells, convexly expanded terminal walls with cell wall fragments (arrowheads). (B) detached cells, cell wall fragment (arrowhead). (C) detached cells, terminal cells with similar Y(II) as adjacent cells, remnants of cross wall (arrowheads). (D) 2-3 celled fragments (white circles) and terminal cells (arrowheads) showing similar Y(II) as cells in longer filaments.
