# Supplementary material for: Localization and Quantification of Callose in the Streptophyte Green Algae Zygnema and Klebsormidium: Correlation with Desiccation Tolerance
Source: PubMed Central journal article supplement — Plant Cell Physiol. 2015 Sep 26;56(11):2259–70. doi: 10.1093/pcp/pcv139 (PMC4650865; doi:10.1093/pcp/pcv139), 2015-09-26
Supplement: supp_pcv139_pcp-2015-e-00365-File014.pdf [file supp_pcv139_pcp-2015-e-00365-File014.pdf]

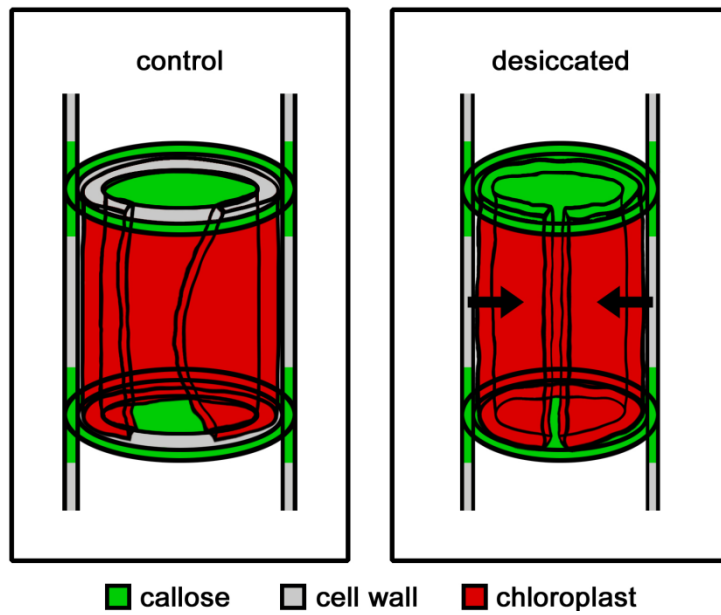

**Supplementary Fig. S5.** Scheme desiccation effects in *Klebsormidium* cell. In hydrated cell, callose is abundant in the longitudinal cell walls between individual cells and the centre of the cross cell walls. The parietal chloroplast is shaped as incompletely closed tube (left). During desiccation, additional incorporation of callose into the cross cell walls allows regulated reduction of the cell diameter. The margins of the tube-like chloroplast become closely attached to prevent strong deformation (right).
