# Supplementary material for: Localization and Quantification of Callose in the Streptophyte Green Algae Zygnema and Klebsormidium: Correlation with Desiccation Tolerance
Source: PubMed Central journal article supplement — Plant Cell Physiol. 2015 Sep 26;56(11):2259–70. doi: 10.1093/pcp/pcv139 (PMC4650865; doi:10.1093/pcp/pcv139), 2015-09-26
Supplement: supp_pcv139_pcp-2015-e-00365-File015.pdf [file supp_pcv139_pcp-2015-e-00365-File015.pdf]

**Supplementary Tab. S1.** Callose content. Comparison of the callose content in two *Zygnema* and *Klebsormidium* species (control and desiccated for 30 min and 210 min) determined by colorimetric quantification (n=4 ± SD). Callose content is expressed in µg pachyman-equivalents per mg algal dry mass. Significances between groups are indicated by small letters. Data were analysed by one-way ANOVA followed by Tukey's post hoc test (p<0.001).

|                                 | <b>control</b> | <b>desiccated 30 min</b> | <b>desiccated 210 min</b> |
|---------------------------------|----------------|--------------------------|---------------------------|
| <i>Zygnema S</i>                | 1.66 ± 0.36a   | 1.59 ± 0.20a             | 1.55 ± 0.39a              |
| <i>Zygnema E-A</i>              | 1.33 ± 0.29a   | 1.24 ± 0.34a             | 1.34 ± 0.61a              |
| <i>Klebsormidium crenulatum</i> | 3.00 ± 0.36b   | 6.30 ± 0.60c             | 9.22 ± 1.99ef             |
| <i>Klebsormidium nitens</i>     | 4.90 ± 0.22d   | 8.33 ± 0.71e             | 10.92 ± 1.28f             |
